# Supplementary material for: Sequestering Biomass for Natural, Efficient, and Low-Cost Direct Air Capture of Carbon Dioxide
Source: Preprints.org preprint supplement (doi:10.20944/preprints202106.0212.v2), 2021-06-15
Supplement: Supplementary file 2 [file supplementary]

Supplemental Input

Sequestering Biomass for Natural, Efficient, and Low- Cost Direct Air Capture of Carbon Dioxide

Jeffrey A. Amelse a,b and Paul K. Behrensc

1. Universidade de Aveiro, Departamento de Química, CICECO, 3810-193 Aveiro, Portugal, JAmelse@UA.Pt
2. Independent Contributor, Batavia, IL USA, AmelseJeff@Gmail.com
3. Independent Contribuitor and Chemical Industry Consultant, Greenfield, IN, USA PKBConsult2@Gmail.com

**SI.1. EXCEL files that Calculate Urban Tree Growth Parameters in 10 Year Increment**s

EXCEL file that calculates tree growth parameters from the allometric equations provided in the USDA report [23].

**SI.2. Calculation of Percentage of Decomposable Biomass in a Bahrain Landfill That Will Have Decomposed as a Function of Years After Landfill Closure**

The following EXCEL file contains calculations of the percentage of decomposable biomass in a Bahrain Landfill that will have decomposed as a function of years after landfill closure based on extrapolation of the US EPA LandGEM model. [30-31].
